# Supplementary material
Source: PubMed Central journal article supplement (PMC7384250)
Supplement: NIHMS1606201-supplement-Supplementary_Table_1.pdf [file NIHMS1606201-supplement-Supplementary_Table_1.pdf]

Supplementary Table 1. Antibody panel used for mass cytometry experiments.

## MAIN

| Channel | Metal | Protein    | Concentration (ug/ml) | Clone         | Vendor      | Catalogue # | Lot #      |
|---------|-------|------------|-----------------------|---------------|-------------|-------------|------------|
| 113     | In    | Ter119     | 3                     | TER119        | Biolegend   | 116202      | B250339    |
| 115     | In    | CD45       | 6                     | 30-F11        | Biolegend   | 103102      | B253429    |
| 139     | La    | Ly6G       | 1.5                   | 1A8           | Biolegend   | 127602      | B265459    |
| 140     | Ce    | IgD        | 3                     | 11-26c.2a     | Biolegend   | 405702      | B165867    |
| 141     | Pr    | CD16/32    | 3                     | 2.4G2         | BD          | 553142      | 8130843    |
| 142     | Nd    | CD49b      | 0.75                  | HM $\alpha$ 2 | Biolegend   | 103501      | --         |
| 143     | Nd    | CD11c      | 0.75                  | N418          | Biolegend   | 117302      | B191075    |
| 144     | Nd    | CD49d      | 3                     | R1-2          | BioLegend   | 103610      | B254009    |
| 145     | Nd    | CD27       | 0.75                  | LG.3A10       | Biolegend   | 124202      | B233065    |
| 146     | Nd    | CD138      | 0.1875                | 281-2         | Biolegend   | 142502      | B233106    |
| 147     | Sm    | PD-L1      | 3                     | 10F.9G2       | Biolegend   | 124302      | B220492    |
| 148     | Nd    | CD103      | 3                     | 2E7           | Biolegend   | 121402      | B249116    |
| 149     | Sm    | SiglecF    | 1.5                   | E50-2440      | BD          | 552125      | 7264727    |
| 150     | Nd    | PDCA-1     | 0.75                  | 129c1         | Biolegend   | 127102      | B188381    |
| 151     | Eu    | Ly6C       | 0.75                  | HK1.4         | Biolegend   | 128002      | B253176    |
| 152     | Sm    | Ki67       | 6                     | SolA15        | BD          | 556003      | 6280947    |
| 153     | Eu    | CD11b      | 3                     | M1/70         | Biolegend   | 101202      | B261558    |
| 154     | Sm    | cKit       | 1.5                   | 2B8           | Biolegend   | 105802      | B241900    |
| 155     | Gd    | CD8        | 3                     | 53-6.7        | Biolegend   | 100702      | B237234    |
| 156     | Gd    | CD4        | 0.75                  | RM4-5         | Biolegend   | 100506      | B251707    |
| 157     | Gd    | CD3        | 0.75                  | 17A2          | Biolegend   | 100202      | B241388    |
| 158     | Gd    | B220       | 1.5                   | RA3-6B2       | Biolegend   | 103202      | B170375    |
| 159     | Tb    | PD-1       | 0.75                  | 29F.1A12      | Biolegend   | 135202      | B196019    |
| 160     | Gd    | NK1.1      | 1.5                   | PK136         | Biolegend   | 108702      | B187819    |
| 161     | Dy    | T-bet      | 6                     | O4-46         | BD          | 561263      | 3032551    |
| 162     | Dy    | TCRgd      | 3                     | GL3           | Biolegend   | 118101      | --         |
| 163     | Dy    | CD62L-FITC | 3                     | MEL-14        | Biolegend   | 104443      | B235113    |
| 164     | Dy    | CD86       | 0.375                 | GL-1          | Biolegend   | 105002      | B244244    |
| 165     | Ho    | CD69       | 0.75                  | Polyclonal    | R&D         | AF2386      | UIU011808A |
| 166     | Er    | FcER1a     | 1.5                   | MAR-1         | Biolegend   | 134321      | B243579    |
| 167     | Er    | Foxp3      | 3                     | NRRF-30       | eBioscience | 14-4771-80  | 1972297    |
| 168     | Er    | RO Rgt     | 6                     | B2D           | eBioscience | 14-6981-82  | --         |
| 169     | Tm    | F4/80      | 1.5                   | BM8           | Biolegend   | 123102      | B226029    |
| 170     | Er    | CD115      | 1.5                   | AF598         | Biolegend   | 135521      | --         |
| 171     | Yb    | CD64       | 6                     | X54-5/7.1     | Biolegend   | 139302      | B270355    |
| 172     | Yb    | GATA3      | 3                     | 16E10A23      | Biolegend   | 653802      | B201420    |
| 173     | Yb    | CD19       | 0.75                  | 6D5           | Biolegend   | 115502      | B166684    |
| 174     | Yb    | IgM        | 6                     | RMM-1         | Biolegend   | 406502      | B256697    |
| 175     | Lu    | CD44       | 0.375                 | IM7           | Biolegend   | 103002      | B246298    |
| 176     | Yb    | CD90       | 0.75                  | G7            | Biolegend   | 105202      | B187334    |
| 209     | Bi    | MHC II     | 0.1875                | M5/114.15.2   | Biolegend   | 107602      | B141287    |

## Other Substitutes

| Channel | Metal | Protein   | Concentration (ug/ml) | Clone      | Vendor           | Catalogue # | Lot #      |
|---------|-------|-----------|-----------------------|------------|------------------|-------------|------------|
| 89      | Y     | Ter119    | 6                     | TER119     | BioLegend        | 116202      | B250339    |
| 113     | In    | CD45.2    | 3                     | 104        | BioLegend        | 109802      | B269632    |
| 115     | In    | CD45.1    | 3                     | A20        | BioLegend        | 110702      | B237865    |
| 140     | Ce    | H2KB      | 3                     | AF6-88.5   | BioLegend        | 116501      | --         |
| 140     | Ce    | KLRG1     | 0.75                  | 2F1        | BD               | 562190      | 8113778    |
| 141     | Pr    | GranzymeB | 3                     | QA16A02    | BioLegend        | 372202      | --         |
| 144     | Nd    | CD43      | 6                     | S7         | BD               | 553268      | 8268962    |
| 160     | Gd    | CD31      | 6                     | MEC13.3    | BioLegend        | 102512      | B226133    |
| 161     | Dy    | CD80      | 3                     | 16-10A1    | BioLegend        | 104702      | B237237    |
| 162     | Dy    | CD83      | 3                     | Michel-19  | BioLegend        | 121502      | B253543    |
| 163     | Dy    | CD62L     | 3                     | 95218      | R&D              | MAB5761     | --         |
| 168     | Er    | CD25      | 3                     | PC61       | BioLegend        | 102014      | B235231    |
| 172     | Yb    | cCaspase3 | 1                     | 5A1E       | Fluidigm         | 3172023A    | 0391807    |
| 174     | Yb    | CD127     | 4                     | A7R34      | BioLegend        | 135002      | B168578    |
| 174     | Yb    | GranzymeB | 1.5                   | GB11       | BioRad           | MCA2120     | --         |
| 176     | Lu    | CD54      | 3                     | YN1/1.7.4  | BioLegend        | 116102      | B197852    |
| 163     | Dy    | a-FITC    |                       | Polyclonal | Southern Biotech | 6400-01     | L1217-QE58 |
| FITC    | NA    | CD62L     | 3                     | MEL-14     | Biolegend        | 104406      | B233014    |
