# Supplementary material
Source: PubMed Central journal article supplement (PMC7384250)
Supplement: NIHMS1606201-supplement-Supplementary_Table_2.pdf [file NIHMS1606201-supplement-Supplementary_Table_2.pdf]

Supplementary Table 2. Antibody panel used for flow cytometry experiments.

| Fluorophore  | Protein | Ratio | Clone     | Vendor      | Catalogue # | Lot #   |
|--------------|---------|-------|-----------|-------------|-------------|---------|
| PE-Dazzle594 | CD3     | 1:100 | 17A2      | Biologend   | 100246      | B246894 |
| PacificBlue  | CD4     | 1:100 | RM4-5     | BD          | 558107      | 56828   |
| BV786        | CD8     | 1:100 | 53-6.7    | BD          | 563332      | --      |
| APC-Cy7      | CD45    | 1:100 | 30-F11    | Biologend   | 103116      | B266564 |
| APC          | CD38    | 1:50  | 90        | Biologend   | 102712      | B259441 |
| PE           | CD101   | 1:50  | Moushi101 | eBioscience | 12-1011-80  | 1911703 |
| PE-Cy7       | PD-1    | 1:100 | 29F.1A12  | Biologend   | 135215      | --      |
| BV421        | TCRb    | 1:100 | H57-597   | Biologend   | 109229      | B264324 |
| PE           | IFNg    | 1:100 | XMG1.2    | Biologend   | 505808      | B265789 |
| BV711        | IL-2    | 1:100 | JES6-5H4  | Biologend   | 503837      | B264812 |
| FITC         | TNFa    | 1:100 | MP6-XT22  | BD          | 554418      | 68325   |
| BV650        | CD8     | 1:100 | 53-6.7    | Biologend   | 100741      | B253266 |
| BV510        | KLRG1   | 1:100 | 2F1/KLRG1 | Biologend   | 138421      | --      |
| BV421        | CD62L   | 1:100 | MEL-14    | Biologend   | 104435      | --      |
| FITC         | CD45.2  | 1:100 | 104       | Biologend   | 109805      | --      |
| APC          | CD8     | 1:100 | 53-6.7    | Biologend   | 100711      | --      |
| PE-Cy7       | MHC II  | 1:200 | AF6-120.1 | Biologend   | 116419      | --      |
| PE           | CD45.1  | 1:100 | A20       | Biologend   | 110708      | B262097 |
