# Supplementary material
Source: PubMed Central journal article supplement (PMC7384250)
Supplement: NIHMS1606201-supplement-Supplementary_Table_3.pdf [file NIHMS1606201-supplement-Supplementary_Table_3.pdf]

Supplementary Table 3. Change in spleen immune cell frequencies with tumor burden.

**two-sided Wilcoxon rank-sum tests with Benjamini-Hochberg correction**

| 4T1                   |          |               |
|-----------------------|----------|---------------|
| Immune Cell Type      | raw pVal | adjusted pVal |
| ClassicalMonocytes    | 5.28E-05 | 0.000686167   |
| Neutrophils           | 5.28E-05 | 0.000686167   |
| Bcells                | 6.55E-05 | 0.000785893   |
| Tregs                 | 8.11E-05 | 0.000891661   |
| gdTCells              | 0.000123 | 0.001232678   |
| nonClassicalMonocytes | 0.000186 | 0.001670571   |
| CD8TCells             | 0.00072  | 0.004320097   |
| NKCells               | 0.000598 | 0.004320097   |
| PlasmaCells           | 0.00072  | 0.004320097   |
| Eosinophils           | 0.001481 | 0.007403936   |
| CD4TCells             | 0.006514 | 0.026055191   |
| pDCs                  | 0.011825 | 0.035476343   |
| cDCs                  | 0.779707 | 0.779706761   |
| Macrophages           | 0.460883 | 0.779706761   |

Number of Animals  
**Controls** 8  
**Tumor** 17  
 p < 0.05  
 P < 0.1  
 nonsignificant

| AT3                   |          |               |
|-----------------------|----------|---------------|
| Immune Cell Type      | raw pVal | adjusted pVal |
| ClassicalMonocytes    | 8.73E-05 | 0.00122275    |
| Neutrophils           | 0.000115 | 0.001489942   |
| Eosinophils           | 0.000253 | 0.003031765   |
| nonClassicalMonocytes | 0.000419 | 0.004611308   |
| Macrophages           | 0.000869 | 0.008688611   |
| Bcells                | 0.001384 | 0.012454788   |
| CD8TCells             | 0.005073 | 0.040583301   |
| pDCs                  | 0.007574 | 0.053018294   |
| cDCs                  | 0.019242 | 0.096212185   |
| NKCells               | 0.016096 | 0.096212185   |
| CD4TCells             | 0.037797 | 0.151188336   |
| gdTCells              | 0.156288 | 0.468863135   |
| PlasmaCells           | 0.488718 | 0.921212055   |
| Tregs                 | 0.921212 | 0.921212055   |

Number of Animals  
**Controls** 10  
**Tumor** 12

| MMTV-PyMT             |          |               |
|-----------------------|----------|---------------|
| Immune Cell Type      | raw pVal | adjusted pVal |
| ClassicalMonocytes    | 0.014248 | 0.170976956   |
| NKCells               | 0.014248 | 0.170976956   |
| nonClassicalMonocytes | 0.014248 | 0.170976956   |
| Neutrophils           | 0.022494 | 0.247436983   |
| CD8TCells             | 0.034611 | 0.311495018   |
| pDCs                  | 0.034611 | 0.311495018   |
| Eosinophils           | 0.051913 | 0.415303719   |
| cDCs                  | 0.075927 | 0.531488741   |
| Bcells                | 0.150786 | 0.799846106   |
| Macrophages           | 0.271899 | 0.799846106   |
| CD4TCells             | 0.446873 | 0.799846106   |
| PlasmaCells           | 0.672604 | 0.799846106   |
| Tregs                 | 0.672604 | 0.799846106   |
| gdTCells              | 0.799846 | 0.799846106   |

Number of Animals  
**Controls** 3  
**Tumor** 7
